# Supplementary material for: A Single-Cell Transcriptome of Bovine Milk Somatic Cells
Source: MDPI journal article supplement (doi:10.3390/genes15030349), 2024-03-10

A

Sample 1, cDNA milk cells

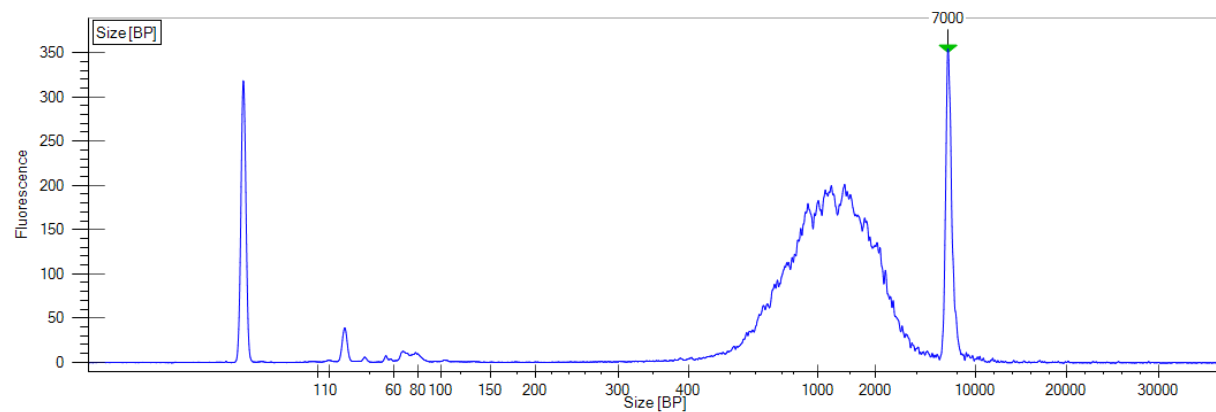

Sample 1, Sequencing library milk cells

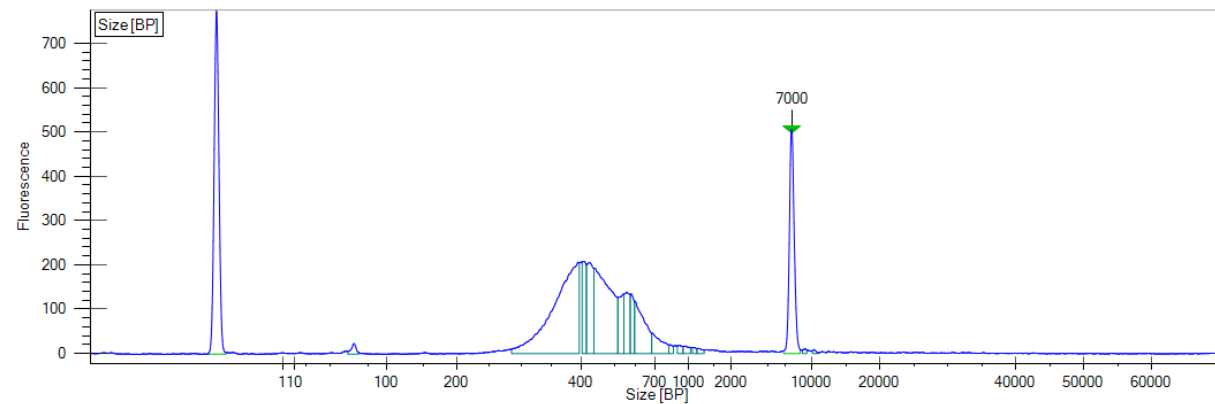

B

Sample 2, cDNA milk cells

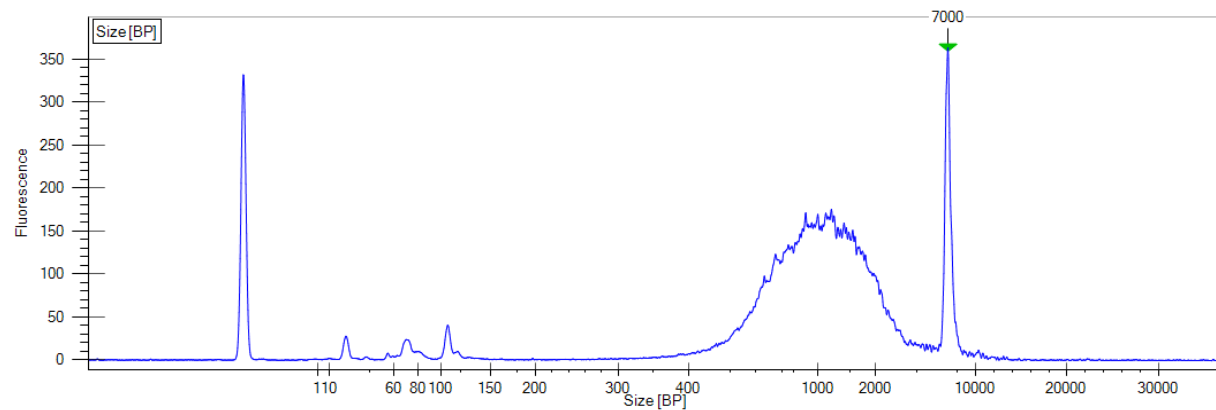

Sample 2, Sequencing library milk cells

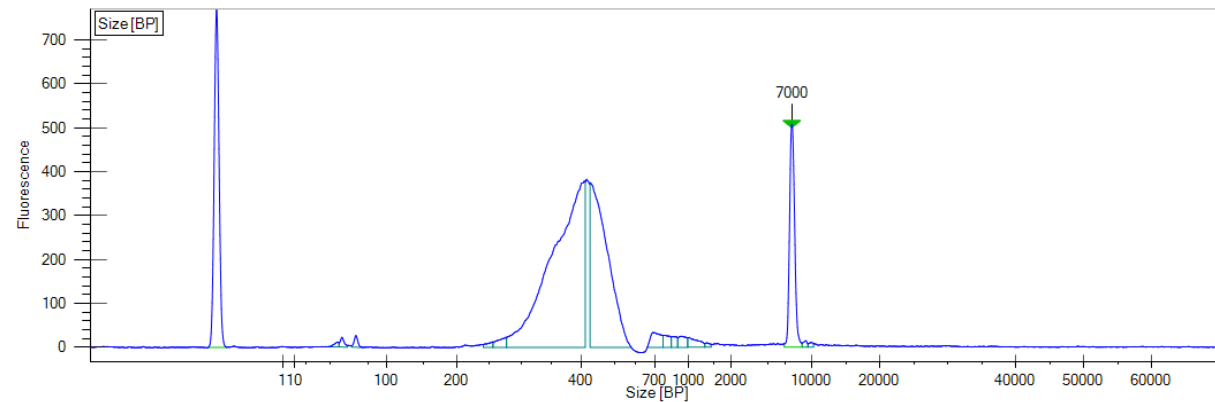

Supplement: s1 [file s1]
